# Supplementary material
Source: PubMed Central journal article supplement (PMC4245978)
Supplement: bi5009326_si_001.pdf [file bi5009326_si_001.pdf]

# A relationship between the transient structure in the monomeric state and the aggregation propensities of $\alpha$ -synuclein and $\beta$ -synuclein

Jane R. Allison,<sup>\*,‡,§</sup> Robert C. Rivers,<sup>‡,||</sup> John C. Christodoulou,<sup>‡,⊥</sup> Michele Vendruscolo,<sup>\*,‡</sup> and Christopher M. Dobson<sup>\*,‡</sup>

*Department of Chemistry, Cambridge University, Lensfield Road, Cambridge CB2 1EW,  
UK*

E-mail: j.allison@massey.ac.nz; mv245@cam.ac.uk; cmd44@cam.ac.uk

## Running header

aggregation propensities of  $\alpha$ -synuclein and  $\beta$ -synuclein

---

<sup>\*</sup>To whom correspondence should be addressed

<sup>‡</sup>Cambridge University

<sup>§</sup>Current address: Centre for Theoretical Chemistry and Physics, Institute of Natural and Mathematical Sciences, Massey University, Albany Highway, Auckland 0632, New Zealand

<sup>||</sup>Current address: Office of Cancer Clinical Proteomics Research, National Cancer Institute, National Institutes of Health, Bethesda, MD, USA

<sup>⊥</sup>Current address: Institute of Structural and Molecular Biology, University College London and Birkbeck College, Gower Street, London WC1E 6BT, UK

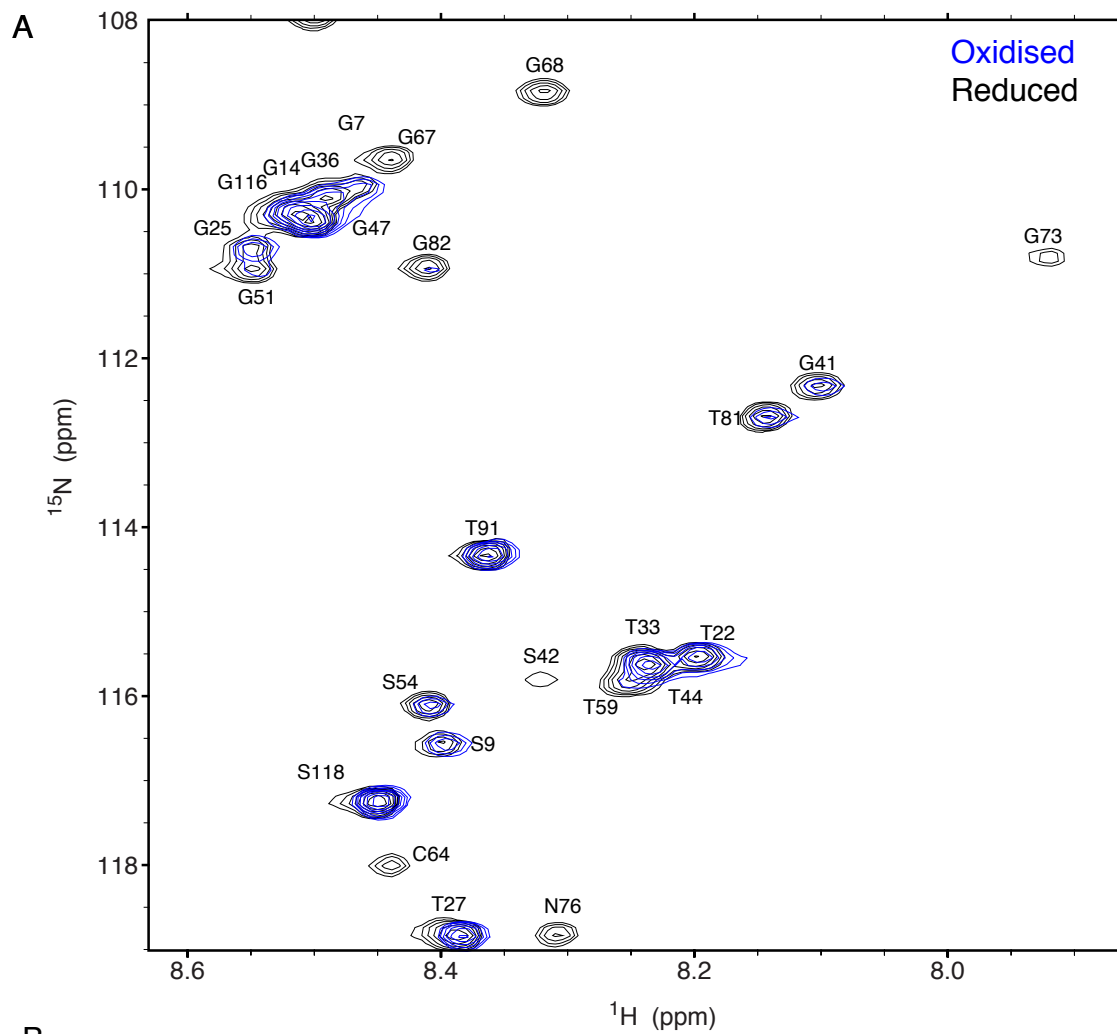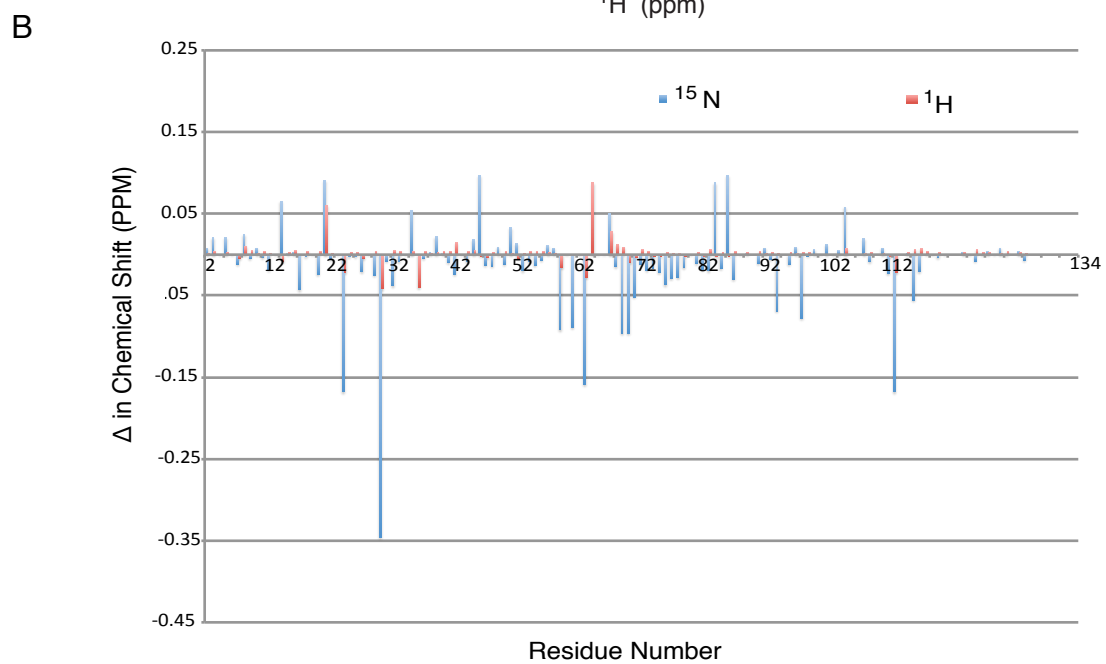

Figure 1: A) Overlay of the  $^1\text{H}$ - $^{15}\text{N}$  HSCQ spectra measured for S64C  $\beta\text{S}$  with the attached MTSL spin label in its oxidized (blue) and reduced (black) state. B) Change in the  $^{15}\text{N}$  (blue) and  $^1\text{H}$  (red) chemical shifts measured for each residue of S64C  $\beta\text{S}$  when the attached MTSL spin label is in its oxidized and reduced forms.

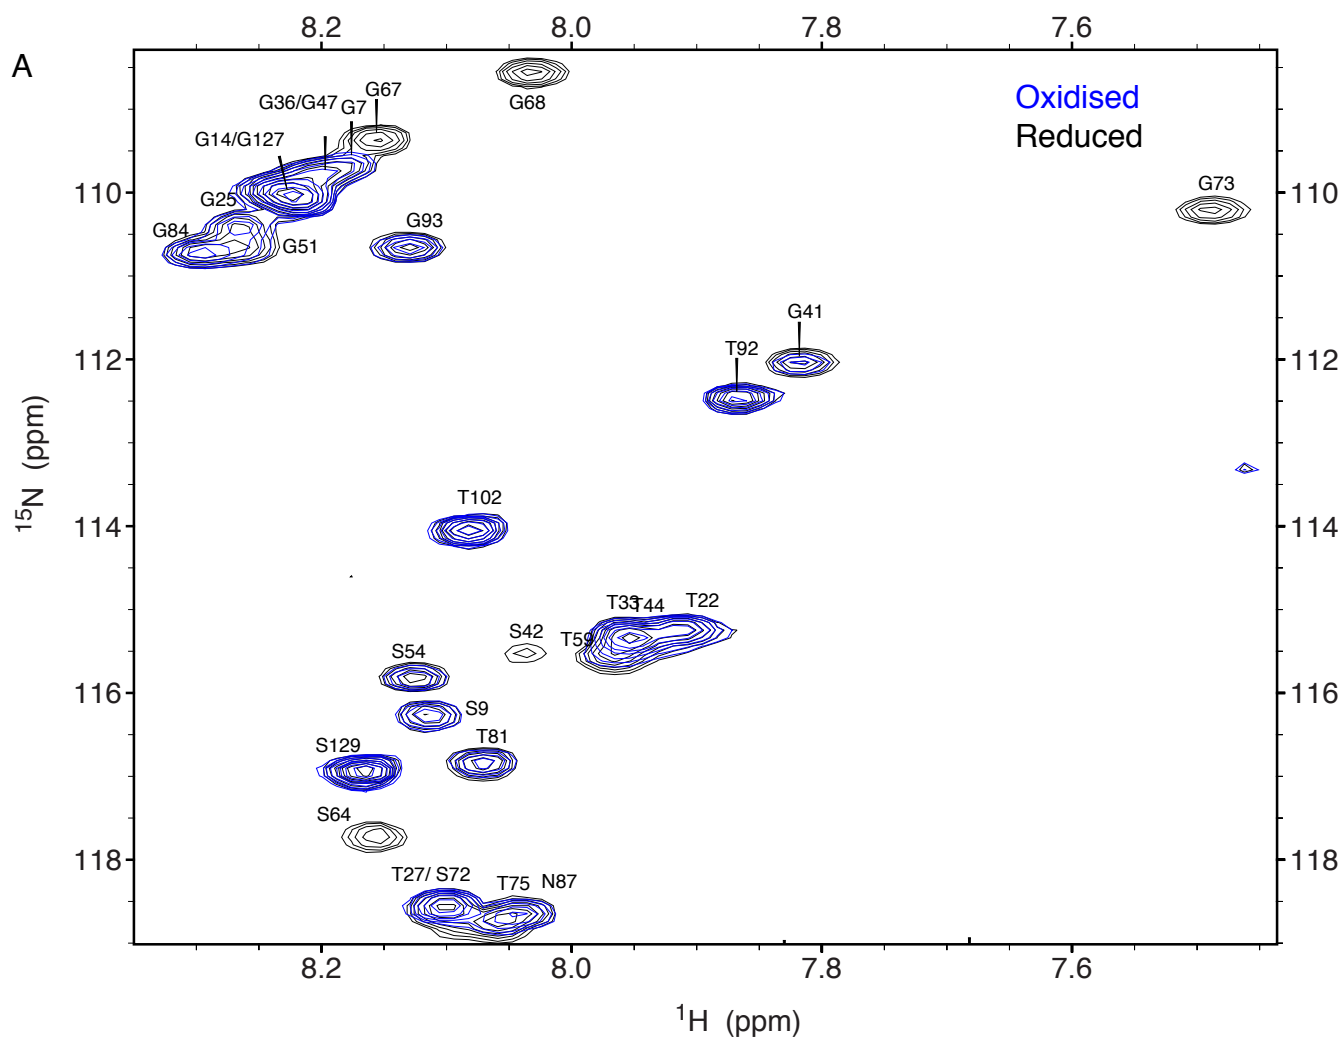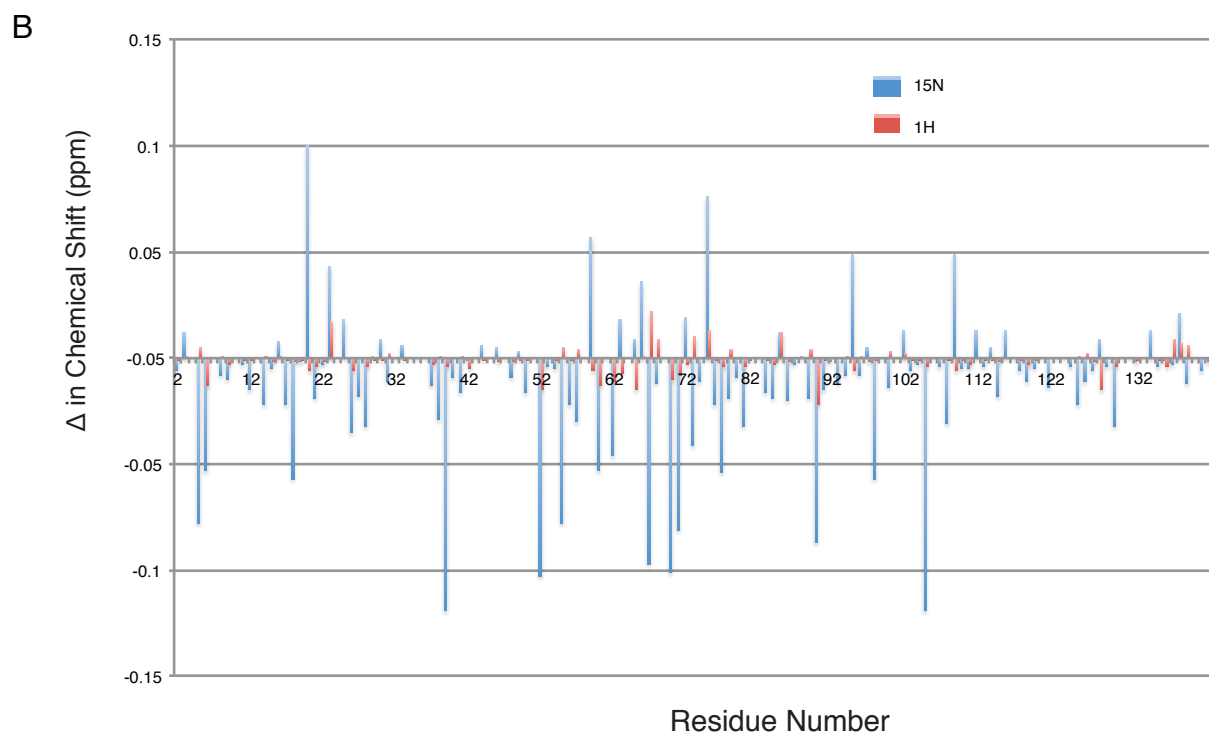

Figure 2: A) Overlay of the  $^1\text{H}$ - $^{15}\text{N}$  HSCQ spectra measured for S64C  $\beta\text{S}_{\text{HC}}$  with the attached MTSL spin label in its oxidized (blue) and reduced (black) state. B) Change in the  $^{15}\text{N}$  (blue) and  $^1\text{H}$  (red) chemical shifts measured for each residue of S64C  $\beta\text{S}_{\text{HC}}$  when the attached MTSL spin label is in its oxidized and reduced forms.

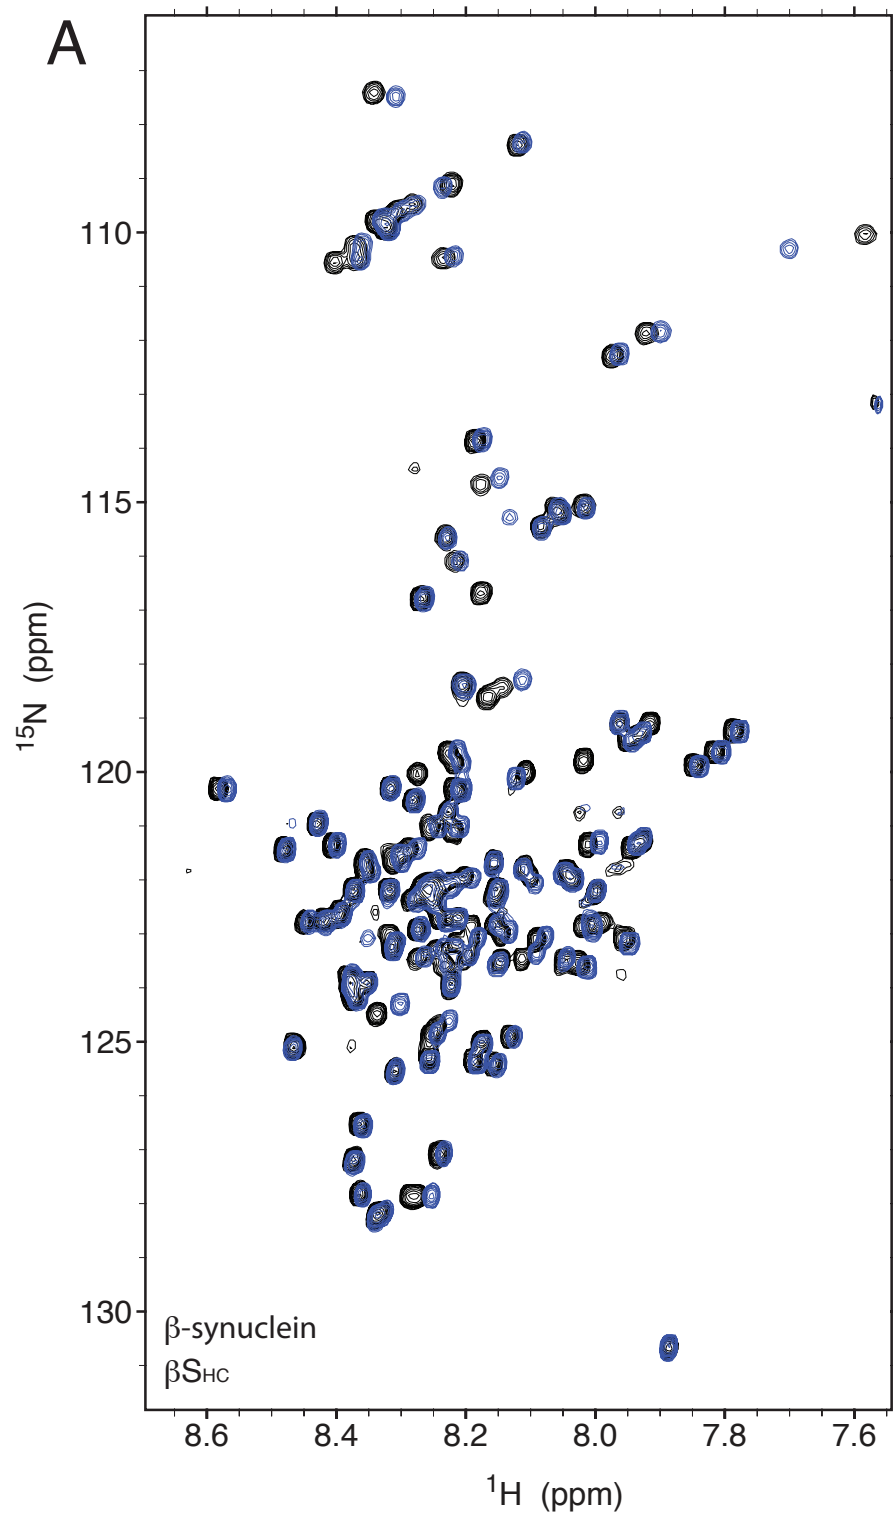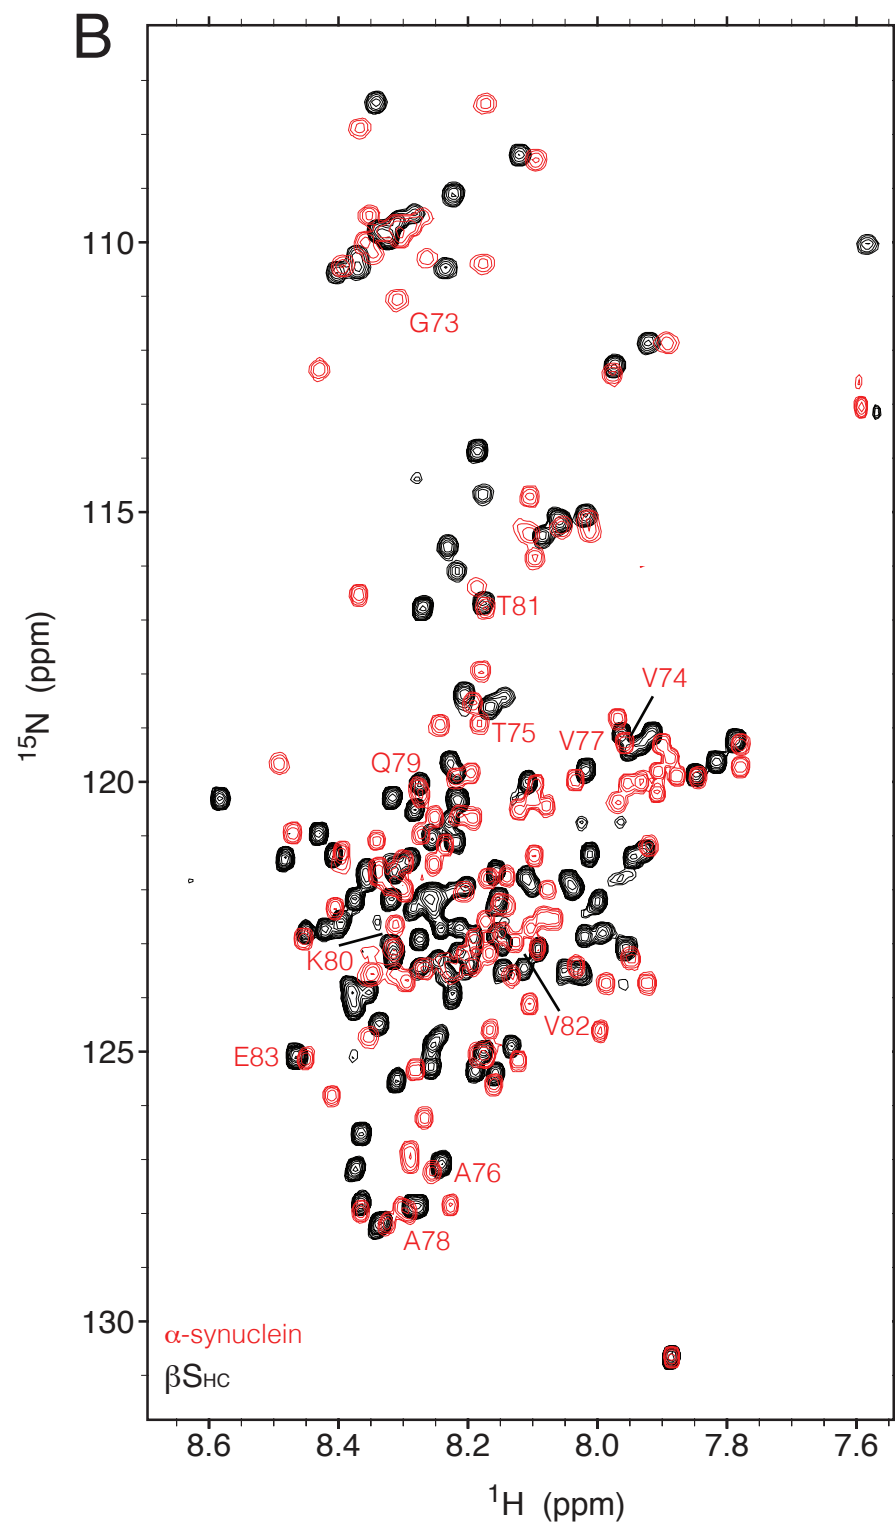

C

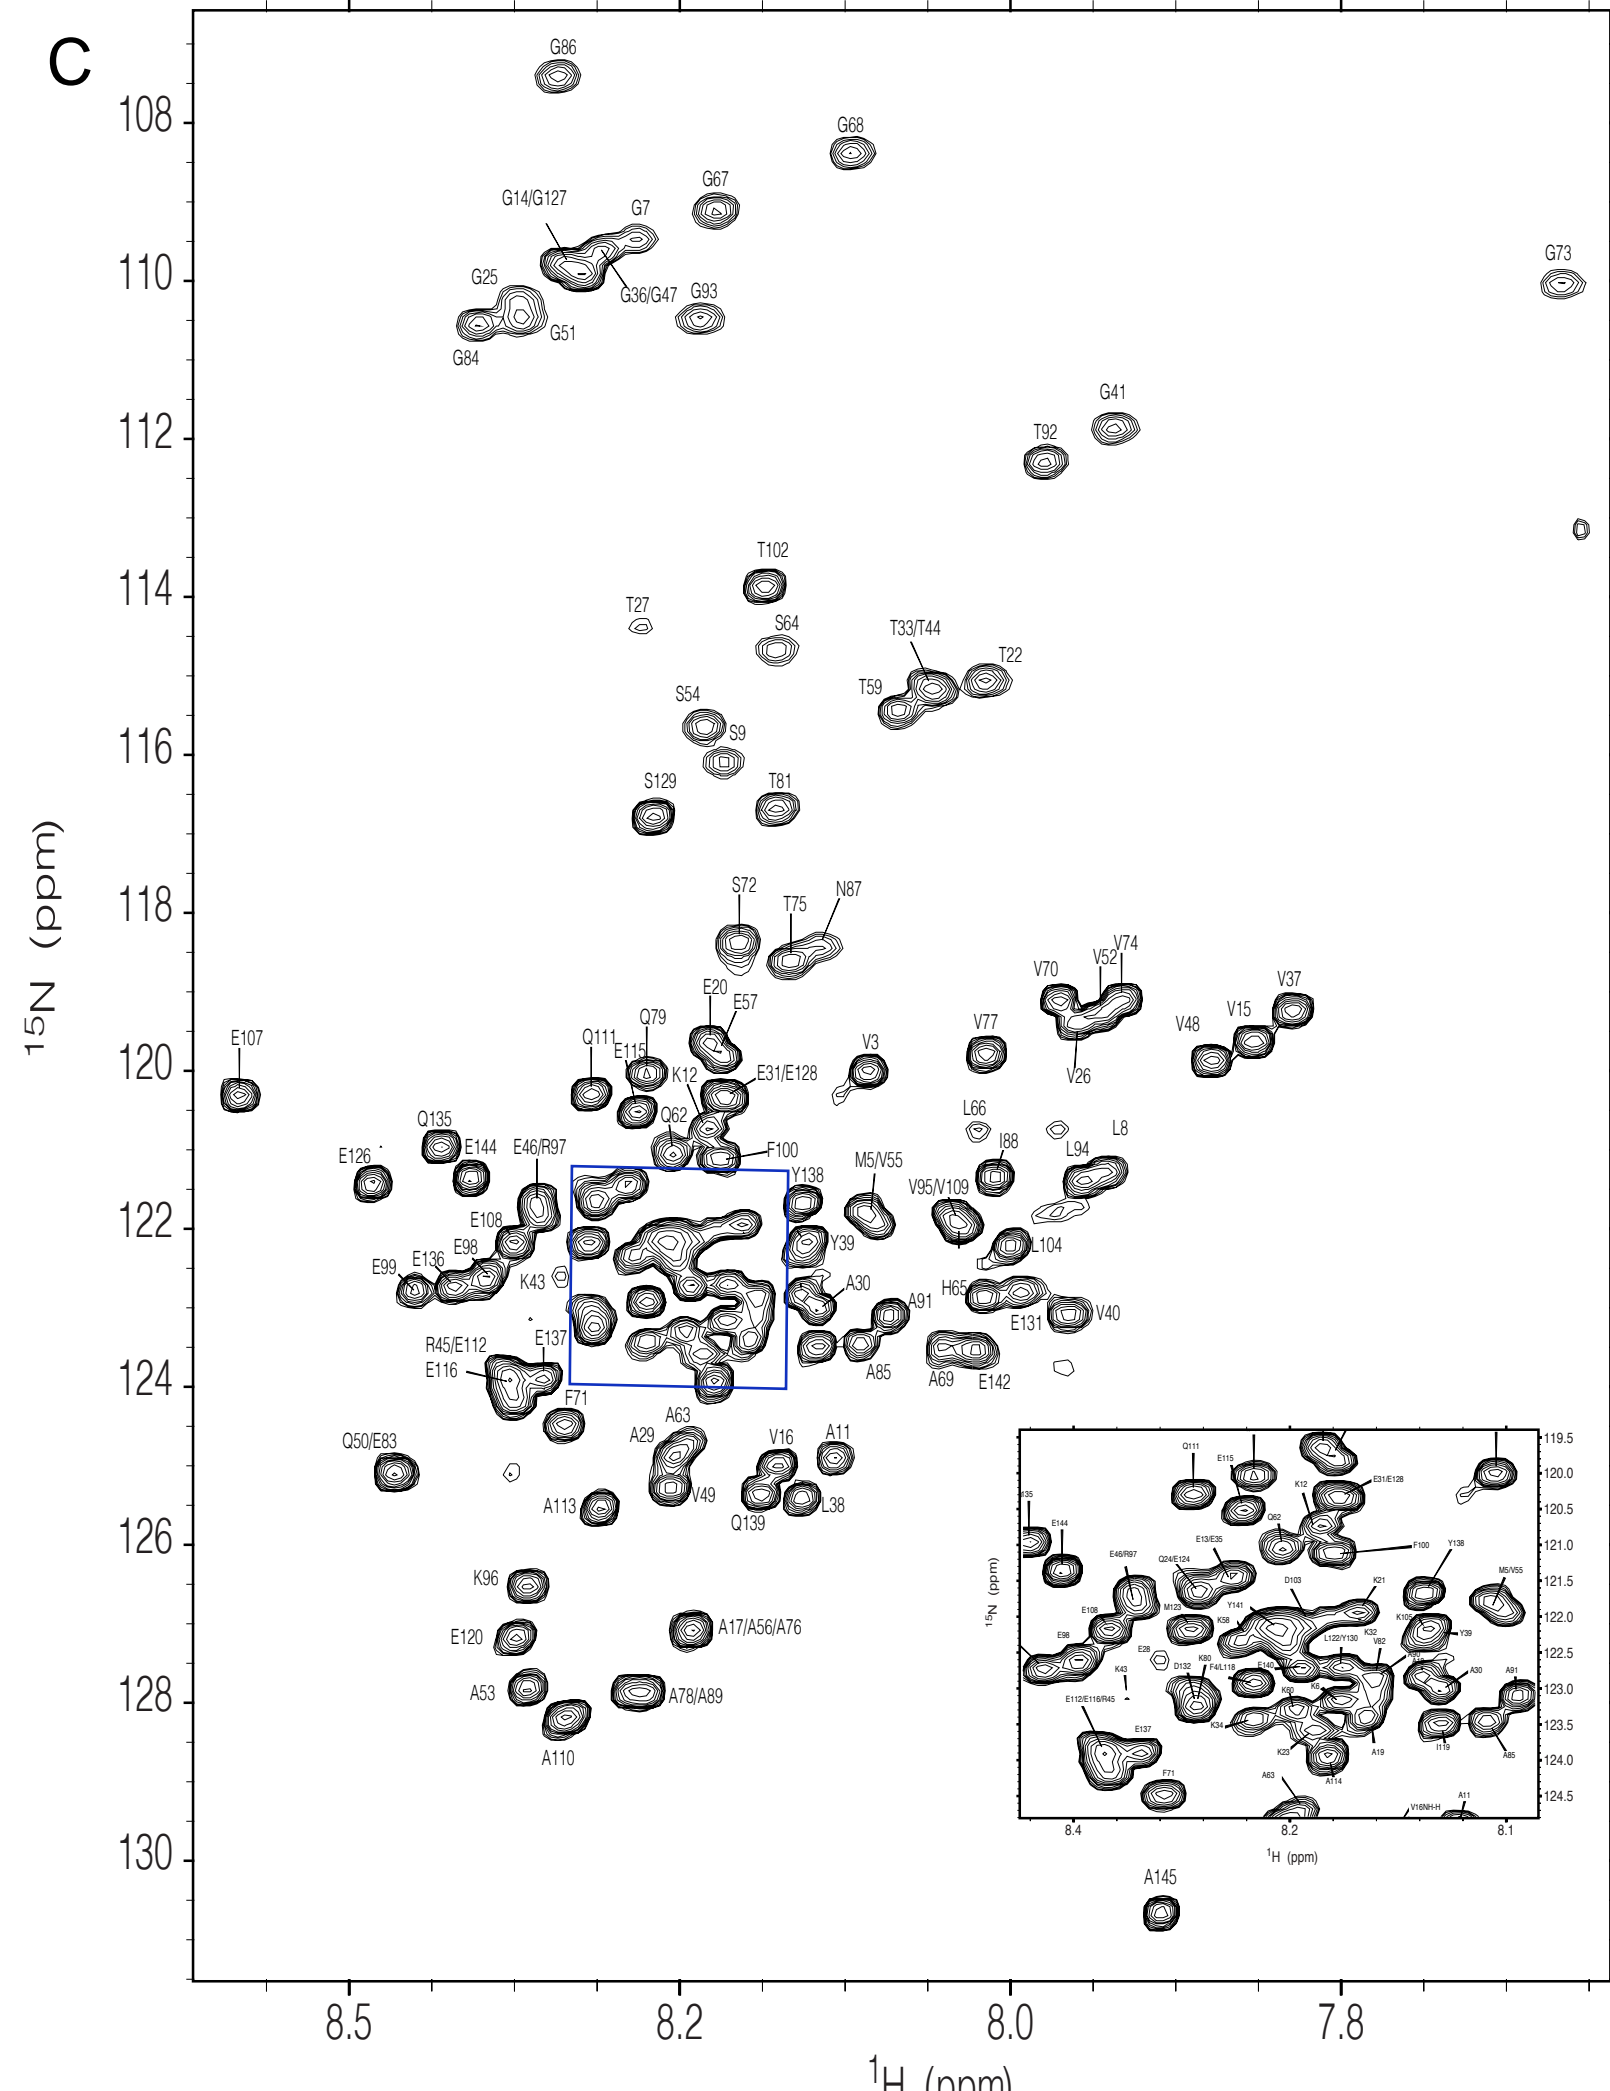

Figure 3:  $^1\text{H}$ - $^{15}\text{N}$  HSCQ spectrum of  $\beta\text{S}_{\text{HC}}$  overlaid with that of (A)  $\beta\text{S}$  and (B)  $\alpha\text{S}$ . Amino acids from the 11 residue segment of  $\alpha\text{S}$  that were added to  $\beta\text{S}$  to form  $\beta\text{S}_{\text{HC}}$  are labeled. (C) Complete  $^1\text{H}$ - $^{15}\text{N}$  HSCQ spectrum of  $\beta\text{S}_{\text{HC}}$ .
